# Supplementary material for: MRP4 over-expression has a role on both reducing nitric oxide-dependent antiplatelet effect and enhancing ADP induced platelet activation
Source: Springer Nature journal article supplement (doi:10.1007/s11239-020-02214-4), 2020-08-14
Supplement: MOESM1 [file 18283782]

## Supplementary Materials

Figure S1

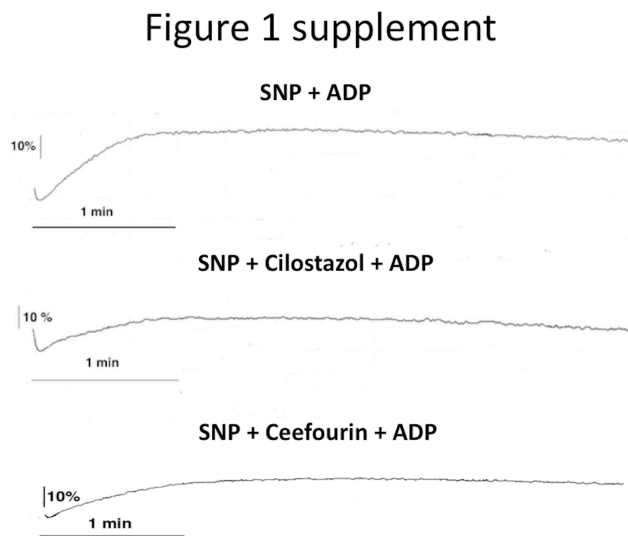

Representative tracers of the effect of Cilostazol (20  $\mu$ M) and Ceefourin (50  $\mu$ M) on ADP (10  $\mu$ M) induced platelet aggregation in chronic aspirin treated patients with ADP-induced aggregation >20%. Cilostazol and Ceefourin were added to SNP treated platelets 10 sec before agonist addition.

Figure S2

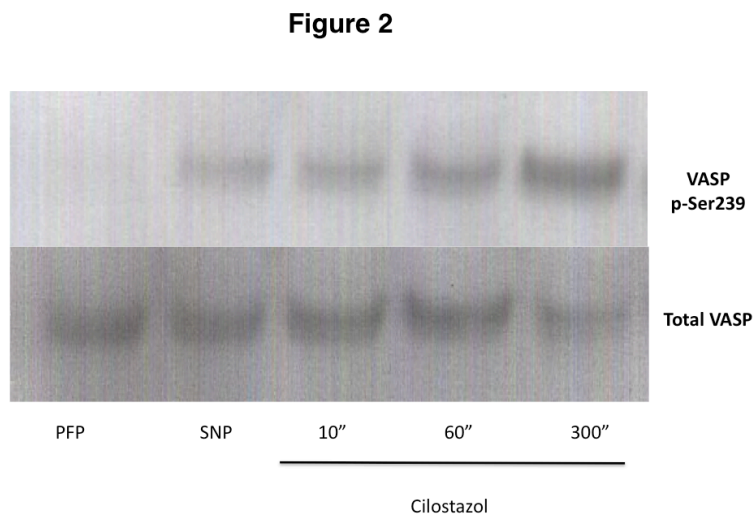

Western blot of 2 performed p-VASP(p-239) in platelets free plasma (PFP) and in SNP-treated platelets untreated and treated with Cilostazol (20  $\mu$ M) for 10-30-300 sec, to evaluate the expression of c-AMP activity. Equal loading amount of proteins is represented by total VASP expression.
